# Supplementary material
Source: PubMed Central journal article supplement (PMC3897241)
Supplement: NIHMS525434-supplement-Supplementary_Materials.pdf [file NIHMS525434-supplement-Supplementary_Materials.pdf]

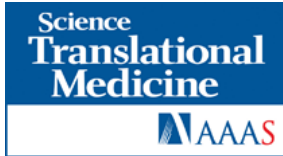

## Supplementary Materials for

### **Systematic Analysis of Challenge-Driven Improvements in Molecular Prognostic Models for Breast Cancer**

Adam A. Margolin,\* Erhan Bilal, Erich Huang, Thea C. Norman, Lars Ottestad, Brigham H. Mecham, Ben Sauerwine, Michael R. Kellen, Lara M. Mangravite, Matthew D. Furia, Hans Kristian Moen Vollan, Oscar M. Rueda, Justin Guinney, Nicole A. Deflaux, Bruce Hoff, Xavier Schildwacher, Hege G. Russnes, Daehoon Park, Veronica O. Vang, Tyler Pirtle, Lamia Youseff, Craig Citro, Christina Curtis, Vessela N. Kristensen, Joseph Hellerstein, Stephen H. Friend,\* Gustavo Stolovitzky, Samuel Aparicio, Carlos Caldas, Anne-Lise Børresen-Dale

\*Corresponding author. E-mail: margolin@sagebase.org (A.A.M.); friend@sagebase.org (S.H.F.)

Published 17 April 2013, *Sci. Transl. Med.* **5**, 181re1 (2013)  
DOI: 10.1126/scitranslmed.3006112

#### **The PDF file includes:**

##### Materials and Methods

Table S1. Univariate and multivariate Cox regression statistics for the clinical covariates in the METABRIC data set.

Table S2. Univariate and multivariate Cox regression statistics for the clinical covariates in the OsloVal data set.

Table S3. The Breast Cancer Challenge Consortium: Challenge participants who submitted a model to phase 3 of the BCC.

## **SUPPLEMENTARY MATERIALS**

### **Materials and Methods**

#### **OsloVal data generation**

**Patient material:** The OsloVal cohort consists of fresh frozen primary tumors from 184 breast cancer patients collected from 1981 to 99 (148 from 1981-89 and 36 from 1994-99) at the Norwegian Radium Hospital. Tumor material was collected for hormone receptor analysis by DCC (dextran coated charcoal) and excess tumor material was stored in a biobank (at -80°C). Frozen tissue samples were first cut in three parts, and tissue sections made from each (6 µm) for later evaluations using IHC. Tissue-Tek was removed from the specimens and all tissue were sliced, mixed and homogenized, and tissue aliquots stored at -80°C. Two tissue fractions of approximately 15 mg each were used for DNA and RNA isolation and analyses.

**mRNA extraction:** Extractions were performed on the QIA symphony SP robot from Qiagen. A total of 400 µl RLT buffer was added to the samples while on dry ice, followed by homogenization (Tissuelyzer). The QIA symphony RNA Kit cat# 931636 from Qiagen was used. Extracted RNA was quantified using Nanodrop 1000 and the RNA integrity determined using the Agilent Bioanalyzer.

**DNA extraction:** Extractions were performed on the QIASymphony SP robot from Qiagen. A total of 20µl Proteinase K and 180µl ATL buffer was added to the tissue aliquot and lysed for three hours at 56 degrees on a Thermomixer with 900 rpm, followed by addition of 4 µl RNase A and incubation at RT for 2 min. The extraction kit used was the QIASymphony DNA mini Kit cat#931236 from Qiagen,

**CNA analyses:** A total of 500 ng Genomic DNA was used for the Affymetrix Genome-Wide Human SNP 6.0 Assay, and processed according to the manufacturer's protocol using the Affymetrix GW Human SNP Nsp/Sty 6.0 assay kit (prod. # 901015). Fragmented and end labeled PCR product were hybridized to the Affymetrix Human SNP 6.0 array (prod. # 901150) followed by incubation for 16 h at 50<sup>0</sup>C at constant rotation (60 rpm). The washing and staining procedure was performed in the Affymetrix Fluidics Station 450. The arrays were scanned at 560 nm using a confocal laser-scanning microscope (Affymetrix Scanner 3000 7G). The SNP calls and Copy number analysis were done using the Affymetrix Genotyping Console Software ver 4.0.

**Expression analysis:** A total of 100 ng total RNA was used for cRNA preparation using the Ambion Illumina Total Prep kit (prod. # AMIL1791). The samples were hybridized to Illumina HT-12 v4 BeadChips, incubated 16h at 580C and subsequently scanned using the Illumina BeadStation.

**Clinical and pathology variables:** Routine tissue sections were retrieved for all patient samples (hematoxylin and eosin stained). Histological type was assessed according to WHO classification (45) and then histological grade were determined (46). ER and PR status were scored using mRNA expression data. HER2 amplification status was scored from SNP6 arrays. Survival time was collected from the national registries

**Data availability**

We provide the METABRIC and OsloVal data described in the paper via two mechanisms. Each mechanism is under different Terms of Use described in the links, be cognizant that these are patient data and therefore fall under data governance rules:

(A) For a 6-month post-Challenge "Validation Phase", we provide registered participants access to the data to re-evaluate their models

<https://synapse.prod.sagebase.org/#!/Synapse:syn1710250>

(B) For those interested in accessing these data for independent research, please use these links for further information on how to obtain access to these protected health data

METABRIC: <https://synapse.prod.sagebase.org/#!/Search:syn1688369>

OsloVal: <https://synapse.prod.sagebase.org/#!/Search:syn1688370>

**Table S1: Univariate and multivariate Cox regression statistics for the clinical covariates in the METABRIC data set.**

| Covariate          | Multivariate Cox regression |           |          |          |          | Univariate Cox regression |           |          |          |          |
|--------------------|-----------------------------|-----------|----------|----------|----------|---------------------------|-----------|----------|----------|----------|
|                    | coef                        | exp(coef) | se(coef) | z        | Pr(> z ) | coef                      | exp(coef) | se(coef) | z        | Pr(> z ) |
| Age at diagnosis   | 0.03946                     | 1.040249  | 0.00349  | 11.3074  | 0        | 0.028595                  | 1.029008  | 0.002929 | 9.764013 | 0        |
| Tumor size         | 0.010088                    | 1.010139  | 0.001815 | 5.557924 | 2.73E-08 | 0.014921                  | 1.015032  | 0.001511 | 9.872802 | 0        |
| Lymph nodes        | 0.053953                    | 1.055435  | 0.006378 | 8.459218 | 0        | 0.06636                   | 1.068612  | 0.004943 | 13.42513 | 0        |
| Intermediate grade | 0.217714                    | 1.243232  | 0.150131 | 1.450162 | 0.147013 | 0.294219                  | 1.342078  | 0.148386 | 1.982796 | 0.04739  |
| High grade         | 0.313008                    | 1.367533  | 0.152654 | 2.050437 | 0.040322 | 0.604817                  | 1.830917  | 0.144895 | 4.174163 | 2.99E-05 |
| ER negative        | 0.145647                    | 1.156787  | 0.115006 | 1.266429 | 0.205359 | 0.320903                  | 1.378372  | 0.076893 | 4.173364 | 3.00E-05 |
| PR negative        | 0.145485                    | 1.1566    | 0.08454  | 1.720888 | 0.085271 | 0.369708                  | 1.447311  | 0.067268 | 5.496077 | 3.88E-08 |
| HER2 negative      | -0.25087                    | 0.778123  | 0.103818 | -2.41646 | 0.015672 | -0.46318                  | 0.62928   | 0.093925 | -4.93135 | 8.17E-07 |
| CT/HT              | -0.08126                    | 0.921953  | 0.334094 | -0.24323 | 0.807829 | -0.22345                  | 0.799753  | 0.319135 | -0.70018 | 0.483813 |
| CT/HT/RT           | -0.77431                    | 0.461022  | 0.22377  | -3.4603  | 0.00054  | -0.55967                  | 0.571396  | 0.215676 | -2.59497 | 0.00946  |
| CT/RT              | -0.35825                    | 0.698896  | 0.21013  | -1.70491 | 0.088211 | -0.27657                  | 0.758382  | 0.204537 | -1.35217 | 0.176322 |
| HT                 | -0.906                      | 0.404138  | 0.215142 | -4.21115 | 2.54E-05 | -0.56977                  | 0.565655  | 0.187623 | -3.03678 | 0.002391 |
| HT/RT              | -1.0773                     | 0.340514  | 0.210783 | -5.11095 | 3.21E-07 | -0.76561                  | 0.465052  | 0.18511  | -4.13596 | 3.53E-05 |
| RT                 | -1.24311                    | 0.288487  | 0.226251 | -5.49438 | 3.92E-08 | -1.32218                  | 0.266553  | 0.207634 | -6.36785 | 1.92E-10 |
| No treatment       | -0.89846                    | 0.407194  | 0.217971 | -4.12194 | 3.76E-05 | -0.86439                  | 0.421307  | 0.193406 | -4.46932 | 7.85E-06 |

Treatment:

CT - Chemo therapy

RT - Radio therapy

HT - Hormonal therapy

**Table S2: Univariate and multivariate Cox regression statistics for the clinical covariates in the OsloVal data set.**

| Covariate          | Multivariate Cox regression |           |          |          |          | Univariate Cox regression |           |          |          |          |
|--------------------|-----------------------------|-----------|----------|----------|----------|---------------------------|-----------|----------|----------|----------|
|                    | coef                        | exp(coef) | se(coef) | z        | Pr(> z ) | coef                      | exp(coef) | se(coef) | z        | Pr(> z ) |
| Age at diagnosis   | 0.038351                    | 1.039096  | 0.015439 | 2.483999 | 0.012992 | 0.034676                  | 1.035285  | 0.007749 | 4.475184 | 7.63E-06 |
| Tumor size         | 0.086823                    | 1.090704  | 0.119527 | 0.726388 | 0.467601 | 0.166058                  | 1.180641  | 0.060727 | 2.73449  | 0.006248 |
| Lymph nodes        | 0.145669                    | 1.156814  | 0.034743 | 4.192749 | 2.76E-05 | 0.132847                  | 1.142075  | 0.017272 | 7.69146  | 1.45E-14 |
| Intermediate grade | 0.296181                    | 1.344713  | 0.838911 | 0.353054 | 0.724048 | 0.775138                  | 2.170891  | 0.470543 | 1.647326 | 0.099491 |
| High grade         | 0.568608                    | 1.765807  | 0.848445 | 0.670177 | 0.502745 | 0.846257                  | 2.330906  | 0.474803 | 1.782331 | 0.074695 |
| ER negative        | 0.947331                    | 2.578818  | 0.409886 | 2.311205 | 0.020822 | 0.298188                  | 1.347415  | 0.177244 | 1.682354 | 0.0925   |
| PR negative        | -0.22781                    | 0.796275  | 0.406875 | -0.5599  | 0.575546 | 0.311458                  | 1.365415  | 0.219119 | 1.421411 | 0.155197 |
| HER2 negative      | 0.221261                    | 1.24765   | 0.46046  | 0.480522 | 0.630856 | -0.19023                  | 0.826768  | 0.254062 | -0.74876 | 0.454002 |
| CT/HT              | 0.677686                    | 1.969316  | 0.43508  | 1.557614 | 0.119325 | 0.902983                  | 2.466951  | 0.294647 | 3.064628 | 0.002179 |
| CT/HT/RT           | 0.346296                    | 1.413821  | 0.566452 | 0.611342 | 0.540973 | 1.040813                  | 2.831519  | 0.317192 | 3.281334 | 0.001033 |
| CT/RT              | -0.43961                    | 0.644287  | 0.812231 | -0.54124 | 0.588343 | -0.09935                  | 0.905427  | 0.609823 | -0.16291 | 0.870586 |
| HT                 | 0.240398                    | 1.271756  | 0.616252 | 0.390097 | 0.696464 | 1.240686                  | 3.457985  | 0.370471 | 3.348945 | 0.000811 |
| HT/RT              | -16.0705                    | 1.05E-07  | 4503.05  | -0.00357 | 0.997153 | -0.49426                  | 0.610025  | 1.019176 | -0.48496 | 0.627707 |
| RT                 | 0.168161                    | 1.183127  | 1.12635  | 0.149297 | 0.881319 | 0.13017                   | 1.139022  | 0.73491  | 0.177123 | 0.859412 |

Treatment:

CT - Chemo therapy

RT - Radio therapy

HT - Hormonal therapy

**Table S3: The Breast Cancer Challenge Consortium: Challenge participants who submitted a model to phase 3 of the BCC.**

| First Name   | Last Name   | Affiliation                                                                                                                                                                                                                                                                              | Email Address                  |
|--------------|-------------|------------------------------------------------------------------------------------------------------------------------------------------------------------------------------------------------------------------------------------------------------------------------------------------|--------------------------------|
| Miika        | Ahdesmäki   | Almac Diagnostics, Almac Group, Craigavon, BT6 3SQD, United Kingdom                                                                                                                                                                                                                      | miika.ahdesmaki@almacgroup.com |
| Robert       | Atlas       | Department of Computer Sciences, University of Wisconsin, Madison, WI 53717, USA                                                                                                                                                                                                         | ratlas@cs.wisc.edu             |
| Nikolay      | Balov       | Department of Biostatistics and Computational Biology, University of Rochester Medical Center, Rochester, NY 14642, USA                                                                                                                                                                  | nikibalov@gmail.com            |
| Bonnie       | Berger      | Departments of Mathematics and Electrical Engineering and Computer Science, Computer Science and Artificial Intelligence Laboratory, Massachusetts Institute of Technology, Cambridge, MA 02139, USA                                                                                     | bab@csail.mit.edu              |
| Archit       | Bhise       | Massachusetts Institute of Technology, Cambridge, MA 02139-4307, USA                                                                                                                                                                                                                     | archit@MIT.EDU                 |
| Eric         | Bonnet      | (1) Institut Curie, 26 Rue d'Ulm, Paris, F-75248 France (2) INSERM, U900, Paris, F-75248 France (3) Centre for Computational Biology @ CIBIO, Mines ParisTech, 35 Rue Saint-Honoré, Fontainebleau, F-77300 France                                                                        | eric.bonnet@curie.fr           |
| Aaron        | Boudreau    | Department of Laboratory Medicine, University of California, San Francisco, San Francisco, CA 94143, USA                                                                                                                                                                                 | aaron.boudreau@ucsf.edu        |
| Chunhui      | Cai         | Department of Biomedical Informatics, University of Pittsburgh, PA 15206-3701, USA                                                                                                                                                                                                       | chunhuic@pitt.edu              |
| Yifei        | Chen        | Department of Computer Science, University of California, Irvine, Irvine, CA 92697, USA                                                                                                                                                                                                  | yifeic@uci.edu                 |
| Jie          | Cheng       | Quantitative Sciences, GlaxoSmithKline, Collegeville, PA 19426, USA                                                                                                                                                                                                                      | jcheng88@gmail.com             |
| Sean         | Cory        | Goodman Cancer Research Centre, McGill University, 1160 Pine Avenue West, Montreal, Quebec, H3A 1A3, Canada                                                                                                                                                                              | sean.cory@gmail.com            |
| Edmund       | Crampin     | Melbourne School of Engineering, The University of Melbourne, Parkville, Victoria, Australia                                                                                                                                                                                             | e.crampin@auckland.ac.nz       |
| Chad         | Creighton   | Division of Biostatistics, Dan L. Duncan Cancer Center, Baylor College of Medicine, Houston, Texas                                                                                                                                                                                       | creight@bcm.edu                |
| Benjamin     | Haibe-Kains | Institut de Recherches Cliniques de Montréal, IRCM, Montreal, Quebec, Canada                                                                                                                                                                                                             | bhaibeka@ircm.qc.ca            |
| Thomas       | Kelder      | TNO, Microbiology and Systems Biology, Zeist, The Netherlands                                                                                                                                                                                                                            | thomaskelder@gmail.com         |
| Jeff         | Knisley     | Institute for Quantitative Biology, East Tennessee State University, Johnson City, TN 37614, USA                                                                                                                                                                                         | knisleyj.etsu@gmail.com        |
| Vincenzo     | Lagani      | Bioinformatics Laboratory, Institute of Computer Science Foundation for Research and Technology (FORTH), N. Plastira 100 Vassilika Vouton, GR-70013 Heraklion, Crete, Greece                                                                                                             | vlagani@ics.forth.gr           |
| Kai Yeung    | Lau         | Amgen Inc, Seattle, 98119 WA, USA                                                                                                                                                                                                                                                        | kaiyeung.lau@gmail.com         |
| Xinghua      | Lu          | Department of Biomedical Informatics, University of Pittsburgh, PA 15206-3701, USA                                                                                                                                                                                                       | xinghua@pitt.edu               |
| Songjian     | Lu          | Department of Biomedical Informatics, University of Pittsburgh, PA 15206-3701, USA                                                                                                                                                                                                       | songjian@pitt.edu              |
| Jian         | Peng        | Computer Science and Artificial Intelligence Laboratory, Massachusetts Institute of Technology, Cambridge, MA 02139, USA                                                                                                                                                                 | jpeng@csail.mit.edu            |
| Robert       | Prill       | IBM Almaden Research Center, San Jose, CA 95120, USA                                                                                                                                                                                                                                     | rjprill@us.ibm.com             |
| Markus       | Ringner     | Department of Oncology, Clinical Sciences, Lund University, Lund, Sweden                                                                                                                                                                                                                 | markus.ringner@med.lu.se       |
| Richard      | Savage      | Systems Biology Centre, University of Warwick, United Kingdom                                                                                                                                                                                                                            | r.s.savage@warwick.ac.uk       |
| Ben          | Silva       | Department of Statistics, Florida State University, Tallahassee, FL 32306-4330, USA                                                                                                                                                                                                      | bsilva@stat.fsu.edu            |
| Piotr        | Sobczyk     | ICM, University of Warsaw, Poland                                                                                                                                                                                                                                                        | sobbombo@gmail.com             |
| Artem        | Sokolov     | Baskin School of Engineering, University of California, Santa Cruz, Santa Cruz, CA 95064, USA                                                                                                                                                                                            | sokolov@soe.ucsc.edu           |
| Emmett       | Sprecher    | Dept of Pathology Informatics, Yale University, New Haven, CT 06511                                                                                                                                                                                                                      | emmett.sprecher@yale.edu       |
| Ioannis      | Tsamardinos | (1) Bioinformatics Laboratory, Institute of Computer Science Foundation for Research and Technology (FORTH) N. Plastira 100 Vassilika Vouton, GR-70013 Heraklion, Crete, Greece (2) Department of Computer Science, University of Crete P.O. Box 2208, GR-71409 Heraklion, Crete, Greece | tsamard@ics.forth.gr           |
| Jean-Philipp | Vert        | (1) Centre for Computational Biology @ CIBIO, Mines ParisTech, 35 Rue Saint-Honoré, Fontainebleau, F-77300 France (2) Institut Curie, 26 Rue d'Ulm, Paris, F-75248 France (3) INSERM, U900, Paris, F-75248 France                                                                        | jean-philippe.vert@mines.org   |
| Yi Kan       | Wang        | Auckland Bioengineering Institute, The University of Auckland, New Zealand                                                                                                                                                                                                               | yikan.wang@auckland.ac.nz      |
| Charles      | Warden      | Bioinformatics Core, Department of Molecular Medicine, City of Hope National Medical Center, Duarte, CA, 91010, USA                                                                                                                                                                      | cwarden@coh.org                |
| Xiaohui      | Xie         | Department of Computer Science, University of California, Irvine, Irvine, CA 92697, USA                                                                                                                                                                                                  | xhx@ics.uci.edu                |
